# Supplementary material for: High Prevalence of Clonal Reproduction and Low Genetic Diversity in Scutellaria floridana, a Federally Threatened Florida-Endemic Mint
Source: MDPI journal article supplement (doi:10.3390/plants12040919), 2023-02-17
Supplement: s1 [file s1]

## SUPPLEMENTAL MATERIALS

**Table S1:** Percent change in NLCD land cover categories between 2001 and 2019 across *S. floridana*'s range, on managed lands within *S. floridana*'s range, within 500 m of populations confirmed to be extant, and within 500 m of populations in which we were unable to locate any individuals.

| Land Cover Categories        | Across Range | Managed Lands | Confirmed Extant | Failed to Find |
|------------------------------|--------------|---------------|------------------|----------------|
| Open Water                   | 0.12         | -0.04         | 0.01             | -0.02          |
| Developed, open space        | -2.79        | -0.01         | 0.06             | -0.53          |
| Developed, low intensity     | 3.07         | 0.01          | 0.04             | 0.05           |
| Developed, medium intensity  | 20.61        | 0.03          | 0.10             | 0.51           |
| Developed, high intensity    | 14.04        | 0.00          | 0.00             | 0.00           |
| Barren Land                  | 1.54         | 0.00          | 0.07             | 0.01           |
| Deciduous Forest             | -33.07       | -0.03         | 0.01             | -0.02          |
| Evergreen Forest             | -13.70       | 0.00          | -1.23            | -1.01          |
| Mixed Forest                 | 17.96        | 0.00          | 0.00             | 0.00           |
| Shrub/Scrub                  | 19.22        | 0.10          | 0.41             | 1.58           |
| Grassland/Herbaceous         | 38.47        | -0.09         | 0.60             | -0.66          |
| Pasture/Hay                  | -1.69        | 0.00          | 0.00             | -0.02          |
| Cultivated Crops             | 0.67         | 0.00          | 0.00             | -0.02          |
| Woody Wetlands               | -2.28        | 1.75          | -0.04            | -3.20          |
| Emerging Herbaceous Wetlands | 21.85        | -1.73         | -0.04            | 3.33           |

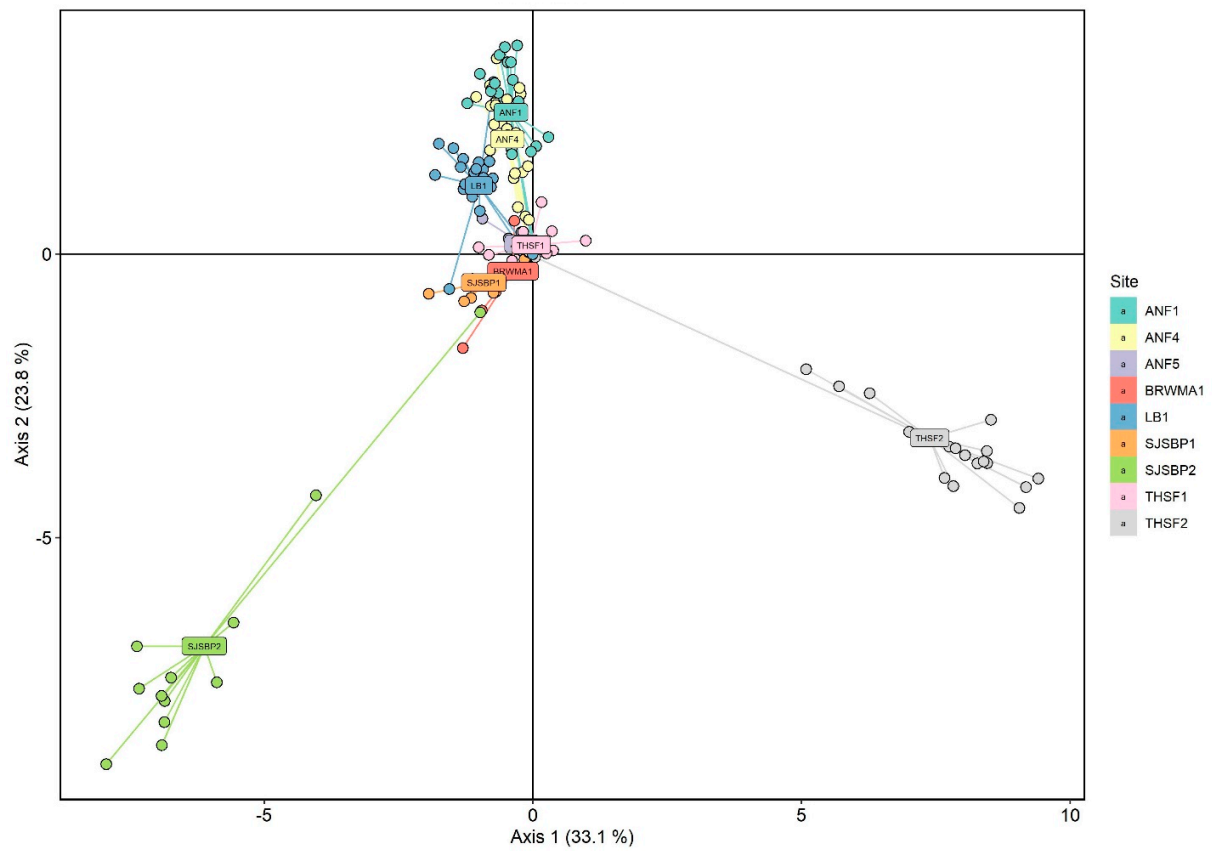

**Figure S1.** DAPC with excluded outlying populations (ANF2, ANF 3, and BRWMA2) using 20 principal components and eight axes. Circles represent individuals and labels are placed on the centroid (average) position for each population.

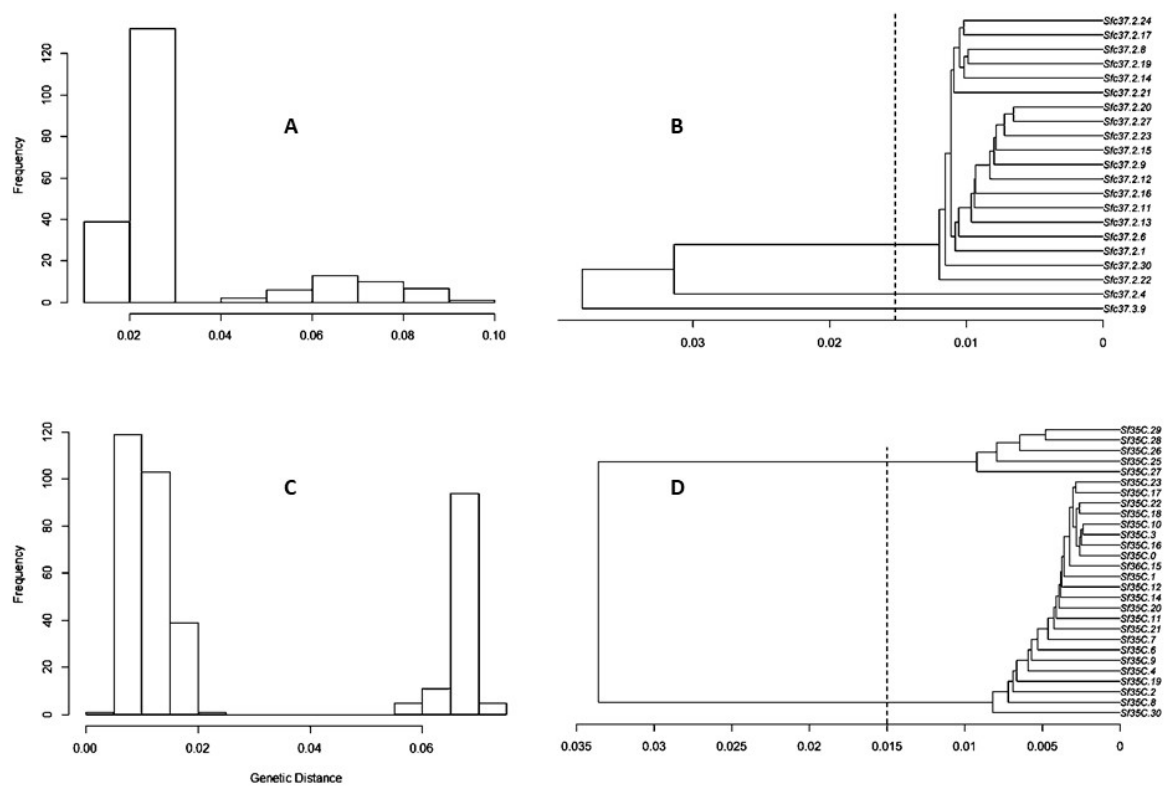

**Figure S2.** Histogram of genetic distances and UPGMA trees for 5 m circular plots established in ANF4 (A and B) and SJSBP2 (C and D). Distance threshold to distinguish individuals was set at 0.03 for both plots (A and C). Dotted line (B and D) represents distance threshold after which individuals are no longer genetically unique.
